# Supplementary material
Source: PubMed Central journal article supplement (PMC7357796)
Supplement: NIHMS1594934-supplement-Supplementary_Tables_1-2_and_SI_figure_caption.pdf [file NIHMS1594934-supplement-Supplementary_Tables_1-2_and_SI_figure_caption.pdf]

Supplemental Materials

**Supplemental Figure 1.** Design for fadrozole (FAD,  $\mu\text{g/L}$ )-trenbolone (TRB,  $\text{ng/L}$ ) mixture study with female fathead minnows aimed at assessing the predictive ability of an AOP network.

**Supplemental Table 1.** Fish loading and sampling scheme for the 48 and 96 h exposures to  $17\beta$ -trenbolone and fadrozole.

| Test Day | Fish Loading                                                                 | 48 h Samples                                                   | 96 h Samples                                                 |
|----------|------------------------------------------------------------------------------|----------------------------------------------------------------|--------------------------------------------------------------|
| 1        | Load 8 fish per tank (4 on each side of divider) into rep 1 (AM)             |                                                                |                                                              |
| 2        | Load 8 fish per tank (4 on each side of divider) into reps 2 (AM) and 3 (PM) |                                                                |                                                              |
| 3        |                                                                              | Sample half of the fish (n=4/tank) from rep 1 (AM)             |                                                              |
| 4        |                                                                              | Sample half of the fish (n=4/tank) from reps 2 (AM) and 3 (PM) |                                                              |
| 5        |                                                                              |                                                                | Sample remaining fish (n=4/tank) from rep 1 (AM)             |
| 6        |                                                                              |                                                                | Sample remaining fish (n=4/tank) from reps 2 (AM) and 3 (PM) |

**Supplemental Table 2.** Fathead minnow gene-specific primer and probe sequences for quantitative polymerase chain reaction analyses. *vtg* = vitellogenin; *cyp19a1a* = aromatase; *cyp11a* = cholesterol side chain cleavage; FW = forward primer; RV = reverse primer; PB = probe

| Gene            | Amplicon size (bp) | Accession # | Primer /Probe   | Sequence (5'→3')                | Reference              |
|-----------------|--------------------|-------------|-----------------|---------------------------------|------------------------|
| <i>vtg</i>      | 69                 | AF130354    | FW              | TCACCACATACGCCAAAAAGC           | Cavallin et al. 2016   |
|                 |                    |             | RV              | CAAGTCTAAAGCCCGTCTGGTT          |                        |
|                 |                    |             | PB <sup>a</sup> | TCTAAGCACATTCTATGGCGGCT         |                        |
| <i>cyp19a1a</i> | 77                 | AF288755    | FW              | TGCTGACACATGCAGAAAACTC          | Villeneuve et al. 2006 |
|                 |                    |             | RV              | CAGCTCTCCGTGGCTCTGA             |                        |
|                 |                    |             | PB <sup>b</sup> | CCAGCTCGACTTCACAGCAGAGTTGATATTC |                        |
| <i>cyp11a</i>   | 72                 | DQ360498    | FW              | CGACACCCGGACTTGCA               | Villeneuve et al. 2007 |
|                 |                    |             | RV              | CACGTCTCCTTTAGAGGTGATACG        |                        |
|                 |                    |             | PB <sup>b</sup> | CCGTGCGGAAATCTCGGCTGC           |                        |

<sup>a</sup> Dual-labeled DNA probe with 5' 6-FAM<sup>TM</sup>/ZEN/3' Iowa Black® FQ Quencher (Integrated DNA Technologies)

<sup>b</sup> Dual-labeled DNA probe with 5'-FAM<sup>TM</sup> (6-carboxyl-fluorescein), 3'-Black Hole Quencher-1® (Integrated DNA Technologies)

## References

Cavallin, J.E., K.J. Jensen, M.D. Kahl, D.L. Villeneuve, K.E. Lee, A.L. Schroeder, J. Mayasich, E.P. Eid, K.R. Nelson, R.Y. Milsk, B.R. Blackwell, J.P. Berninger, C.A. LaLone, C. Blanksma, T. Jicha, C. Elonen, R. Johnson and G.T. Ankley. 2016. Pathway-based approaches for assessment of real-time exposure to an estrogenic wastewater treatment plant effluent on fathead minnow reproduction. *Environ. Toxicol. Chem.* 35: 702-716.

Villeneuve, D.L., I. Knoebl, M.D. Kahl, K.M. Jensen, D.E. Hammermeister, K.J. Greene, L.S. Blake and G.T. Ankley. 2006. Relationship between brain and ovary aromatase activity and isoform-specific aromatase mRNA expression in the fathead minnow (*Pimephales promelas*). *Aquat. Toxicol.* 76: 353-368.

Villeneuve, D.L., L.S. Blake, J.D. Brodin, K.J. Greene, I. Knoebl, A.L. Miracle, D. Martinovic and G.T. Ankley. 2007. Transcription of key genes regulating gonadal steroidogenesis in control and ketoconazole- or vinclozolin-exposed fathead minnows. *Toxicol. Sci.* 98: 395-407.
